# Supplementary material
Source: PubMed Central journal article supplement (PMC4553239)
Supplement: NIHMS681153-supplement-Appendix.pdf [file NIHMS681153-supplement-Appendix.pdf]

**MAPPING STARMETRICS AGGREGATE OCCUPATIONAL CATEGORIES**

**FACULTY**

|   | Permanence [P] | Research Role [R]  | Track [T]              | Scientific Training [S]  | Clinical Association [C] |
|---|----------------|--------------------|------------------------|--------------------------|--------------------------|
| 1 | Permanent      | Provide oversight  | Professorial track     | Advanced degree          | Clinical                 |
| 2 | Non-Permanent  | Generate new ideas | Non-Professorial track | Some scientific training | Non-clinical             |
| 3 |                | Provide support    | No track               | No scientific training   |                          |

**CLINICIAN**

|   | Permanence [P] | Research Role [R]  | Track [T]              | Scientific Training [S]  | Clinical Association [C] |
|---|----------------|--------------------|------------------------|--------------------------|--------------------------|
| 1 | Permanent      | Provide oversight  | Professorial track     | Advanced degree          | Clinical                 |
| 2 | Non-Permanent  | Generate new ideas | Non-Professorial track | Some scientific training | Non-clinical             |
| 3 |                | Provide support    | No track               | No scientific training   |                          |

**POSTDOCTORAL RESEARCH**

|   | Permanence [P] | Research Role [R]  | Track [T]              | Scientific Training [S]  | Clinical Association [C] |
|---|----------------|--------------------|------------------------|--------------------------|--------------------------|
| 1 | Permanent      | Provide oversight  | Professorial track     | Advanced degree          | Clinical                 |
| 2 | Non-Permanent  | Generate new ideas | Non-Professorial track | Some scientific training | Non-clinical             |
| 3 |                | Provide support    | No track               | No scientific training   |                          |

**GRADUATE STUDENT**

|   | Permanence [P] | Research Role [R]  | Track [T]              | Scientific Training [S]  | Clinical Association [C] |
|---|----------------|--------------------|------------------------|--------------------------|--------------------------|
| 1 | Permanent      | Provide oversight  | Professorial track     | Advanced degree          | Clinical                 |
| 2 | Non-Permanent  | Generate new ideas | Non-Professorial track | Some scientific training | Non-clinical             |
| 3 |                | Provide support    | No track               | No scientific training   |                          |

**UNDERGRADUATE STUDENT**

|   | Permanence [P] | Research Role [R]  | Track [T]              | Scientific Training [S]  | Clinical Association [C] |
|---|----------------|--------------------|------------------------|--------------------------|--------------------------|
| 1 | Permanent      | Provide oversight  | Professorial track     | Advanced degree          | Clinical                 |
| 2 | Non-Permanent  | Generate new ideas | Non-Professorial track | Some scientific training | Non-clinical             |
| 3 |                | Provide support    | No track               | No scientific training   |                          |

**STAFF SCIENTIST/TECHNICIAN**

|   | Permanence [P] | Research Role [R]  | Track [T]              | Scientific Training [S]  | Clinical Association [C] |
|---|----------------|--------------------|------------------------|--------------------------|--------------------------|
| 1 | Permanent      | Provide oversight  | Professorial track     | Advanced degree          | Clinical                 |
| 2 | Non-Permanent  | Generate new ideas | Non-Professorial track | Some scientific training | Non-clinical             |
| 3 |                | Provide support    | No track               | No scientific training   |                          |

**RESEARCH ANALYST/COORDINATOR**

|   | Permanence [P] | Research Role [R]  | Track [T]              | Scientific Training [S]  | Clinical Association [C] |
|---|----------------|--------------------|------------------------|--------------------------|--------------------------|
| 1 | Permanent      | Provide oversight  | Professorial track     | Advanced degree          | Clinical                 |
| 2 | Non-Permanent  | Generate new ideas | Non-Professorial track | Some scientific training | Non-clinical             |
| 3 |                | Provide support    | No track               | No scientific training   |                          |

**RESEARCH SUPPORT**

|   | Permanence [P] | Research Role [R]  | Track [T]              | Scientific Training [S]  | Clinical Association [C] |
|---|----------------|--------------------|------------------------|--------------------------|--------------------------|
| 1 | Permanent      | Provide oversight  | Professorial track     | Advanced degree          | Clinical                 |
| 2 | Non-Permanent  | Generate new ideas | Non-Professorial track | Some scientific training | Non-clinical             |
| 3 |                | Provide support    | No track               | No scientific training   |                          |
